# Supplementary material for: Genome-Wide Scan for Methylation Profiles in Keloids
Source: PubMed Central journal article supplement (PMC4446486; doi:10.1155/2015/943176), 2015-05-14
Supplement: 943176.f1.pdf [file 943176.f1.pdf]

**Supplementary Table 1: Tier 3 significantly differentiated CpGs and their corresponding genes**

| Target ID  | Normal (mean $\beta$ ) | Keloid (mean $\beta$ ) | Mean $\beta$ ratio (keloid vs normal) | Gene Name       | Methylation Status |
|------------|------------------------|------------------------|---------------------------------------|-----------------|--------------------|
| cg21052932 | 0.6405                 | 0.316151               | 0.493599                              | <i>ABHD12B</i>  | hypomethylated     |
| cg22960869 | 0.407755               | 0.130023               | 0.318876                              | <i>ABI3</i>     | hypomethylated     |
| cg01270001 | 0.056313               | 0.267278               | 4.746288                              | <i>ACTR3C</i>   | hypemethylated     |
| cg10348193 | 0.06322                | 0.283151               | 4.478798                              | <i>ACTR3C</i>   | hypemethylated     |
| cg11026333 | 0.027539               | 0.229677               | 8.339962                              | <i>ACTR3C</i>   | hypemethylated     |
| cg21151432 | 0.124841               | 0.325219               | 2.605056                              | <i>ADCY3</i>    | hypemethylated     |
| cg12741645 | 0.414373               | 0.139782               | 0.337335                              | <i>AEN</i>      | hypomethylated     |
| cg11808936 | 0.511494               | 0.234321               | 0.458112                              | <i>AFAP1</i>    | hypomethylated     |
| cg12610832 | 0.07638                | 0.327356               | 4.285899                              | <i>AHDC1</i>    | hypomethylated     |
| cg23447569 | 0.33071                | 0.67257                | 2.033719                              | <i>AHNAK</i>    | hypemethylated     |
| cg25229172 | 0.154144               | 0.354335               | 2.298722                              | <i>AMDHD1</i>   | hypemethylated     |
| cg24552844 | 0.515027               | 0.256552               | 0.498133                              | <i>AMICA1</i>   | hypomethylated     |
| cg26547698 | 0.668441               | 0.116209               | 0.173852                              | <i>ANKRD11</i>  | hypomethylated     |
| cg25733272 | 0.202181               | 0.417417               | 2.064568                              | <i>AOAH</i>     | hypemethylated     |
| cg16066354 | 0.396425               | 0.153572               | 0.387392                              | <i>APOBEC3D</i> | hypomethylated     |
| cg09015973 | 0.576903               | 0.262442               | 0.454915                              | <i>ARHGEF4</i>  | hypomethylated     |
| cg22367549 | 0.410991               | 0.168195               | 0.409243                              | <i>ATP2B4</i>   | hypomethylated     |
| cg16389901 | 0.087854               | 0.35652                | 4.058102                              | <i>BMP4</i>     | hypomethylated     |
| cg15494458 | 0.405114               | 0.18764                | 0.463179                              | <i>BPI</i>      | hypomethylated     |
| cg14472181 | 0.25149                | 0.519987               | 2.067625                              | <i>BRD3</i>     | hypemethylated     |
| cg11365617 | 0.415572               | 0.190492               | 0.458385                              | <i>C12orf34</i> | hypomethylated     |
| cg24736933 | 0.119067               | 0.37742                | 3.169812                              | <i>C15orf52</i> | hypemethylated     |
| cg04245402 | 0.316311               | 0.747164               | 2.362121                              | <i>C19orf21</i> | hypemethylated     |
| cg13689560 | 0.347205               | 0.101869               | 0.293397                              | <i>C19orf36</i> | hypomethylated     |
| cg24088508 | 0.050797               | 0.260099               | 5.12037                               | <i>C1orf109</i> | hypemethylated     |
| cg04499514 | 0.581593               | 0.207134               | 0.356148                              | <i>C3AR1</i>    | hypomethylated     |
| cg09238677 | 0.355766               | 0.100977               | 0.283831                              | <i>C3AR1</i>    | hypomethylated     |
| cg12289251 | 0.231811               | 0.484501               | 2.090073                              | <i>CACNB2</i>   | hypemethylated     |
| cg25327888 | 0.067591               | 0.280677               | 4.152601                              | <i>CACNB2</i>   | hypemethylated     |
| cg06075311 | 0.32543                | 0.122811               | 0.37738                               | <i>CALHM2</i>   | hypomethylated     |

|            |          |          |          |                |                |
|------------|----------|----------|----------|----------------|----------------|
| cg24587601 | 0.566718 | 0.251257 | 0.443355 | <i>CASS4</i>   | hypomethylated |
| cg12154803 | 0.076925 | 0.319923 | 4.158884 | <i>CCDC34</i>  | hypemethylated |
| cg25229172 | 0.154144 | 0.354335 | 2.298722 | <i>CCDC38</i>  | hypemethylated |
| cg10439431 | 0.54123  | 0.260691 | 0.481665 | <i>CCL23</i>   | hypomethylated |
| cg14916288 | 0.495439 | 0.217572 | 0.439149 | <i>CCL23</i>   | hypomethylated |
| cg11303839 | 0.556402 | 0.185663 | 0.333684 | <i>CCL26</i>   | hypomethylated |
| cg23817981 | 0.454894 | 0.145815 | 0.320548 | <i>CCR4</i>    | hypomethylated |
| cg03477080 | 0.354115 | 0.122361 | 0.345539 | <i>CCRL2</i>   | hypomethylated |
| cg08679238 | 0.330332 | 0.120913 | 0.366033 | <i>CCRL2</i>   | hypomethylated |
| cg12579212 | 0.387102 | 0.136471 | 0.352546 | <i>CCRL2</i>   | hypomethylated |
| cg13070763 | 0.342344 | 0.116972 | 0.341679 | <i>CCRL2</i>   | hypomethylated |
| cg14754581 | 0.399205 | 0.157961 | 0.395689 | <i>CCRL2</i>   | hypomethylated |
| cg13018120 | 0.488364 | 0.195633 | 0.400589 | <i>CD300E</i>  | hypomethylated |
| cg23557926 | 0.316312 | 0.08085  | 0.255602 | <i>CFH</i>     | hypomethylated |
| cg16519762 | 0.253649 | 0.521838 | 2.057327 | <i>CHD3</i>    | hypemethylated |
| cg01487542 | 0.589477 | 0.287697 | 0.488055 | <i>CMAH</i>    | hypomethylated |
| cg25832824 | 0.068498 | 0.305011 | 4.452872 | <i>CMKLR1</i>  | hypemethylated |
| cg18693704 | 0.207502 | 0.461046 | 2.221891 | <i>CMTM4</i>   | hypemethylated |
| cg06484514 | 0.1476   | 0.39528  | 2.678047 | <i>COL18A1</i> | hypemethylated |
| cg23601416 | 0.264688 | 0.541629 | 2.04629  | <i>COMT</i>    | hypemethylated |
| cg23281552 | 0.466839 | 0.213535 | 0.457406 | <i>CREB5</i>   | hypomethylated |
| cg03992638 | 0.547668 | 0.259675 | 0.474146 | <i>CXXC5</i>   | hypomethylated |
| cg18264728 | 0.536104 | 0.2584   | 0.481996 | <i>DAB2</i>    | hypomethylated |
| cg21037265 | 0.3711   | 0.093673 | 0.252419 | <i>DENND1C</i> | hypomethylated |
| cg26597727 | 0.429102 | 0.207644 | 0.483903 | <i>DENND1C</i> | hypomethylated |
| cg15354065 | 0.240065 | 0.523784 | 2.181843 | <i>DGKA</i>    | hypemethylated |
| cg01262913 | 0.371074 | 0.142815 | 0.38487  | <i>DSCR9</i>   | hypomethylated |
| cg11399508 | 0.364316 | 0.145544 | 0.399498 | <i>DSCR9</i>   | hypomethylated |
| cg07318313 | 0.398256 | 0.167273 | 0.420013 | <i>ENG</i>     | hypomethylated |
| cg03316237 | 0.464197 | 0.223841 | 0.482212 | <i>EXOC3L2</i> | hypomethylated |
| cg14753355 | 0.397075 | 0.141115 | 0.355386 | <i>F2RL3</i>   | hypomethylated |
| cg19319487 | 0.546016 | 0.234365 | 0.429227 | <i>FAM168A</i> | hypomethylated |

|            |          |          |          |                 |                |
|------------|----------|----------|----------|-----------------|----------------|
| cg02293775 | 0.183471 | 0.386752 | 2.107974 | <i>FAM53B</i>   | hypemethylated |
| cg25120326 | 0.454807 | 0.226865 | 0.498817 | <i>FBLN2</i>    | hypomethylated |
| cg00052684 | 0.225066 | 0.497574 | 2.210792 | <i>FKBP5</i>    | hypemethylated |
| cg02637352 | 0.315877 | 0.663385 | 2.100135 | <i>FLJ41603</i> | hypemethylated |
| cg24208206 | 0.080884 | 0.342936 | 4.239825 | <i>FYCO1</i>    | hypemethylated |
| cg15307891 | 0.272924 | 0.019466 | 0.071324 | <i>GALNT3</i>   | hypomethylated |
| cg10517535 | 0.242268 | 0.519883 | 2.145899 | <i>GAS7</i>     | hypemethylated |
| cg06306927 | 0.334689 | 0.085726 | 0.256137 | <i>GHDC</i>     | hypomethylated |
| cg20795023 | 0.435376 | 0.174743 | 0.401361 | <i>GIMAP1</i>   | hypomethylated |
| cg03852144 | 0.470177 | 0.200492 | 0.426419 | <i>GLRX</i>     | hypomethylated |
| cg10949007 | 0.433034 | 0.167379 | 0.386527 | <i>GLRX</i>     | hypomethylated |
| cg22689909 | 0.403821 | 0.122694 | 0.303833 | <i>GLRX</i>     | hypomethylated |
| cg25217276 | 0.321193 | 0.112529 | 0.350346 | <i>GNG4</i>     | hypomethylated |
| cg22960869 | 0.407755 | 0.130023 | 0.318876 | <i>GNGT2</i>    | hypomethylated |
| cg26170660 | 0.43583  | 0.212553 | 0.487697 | <i>GPX5</i>     | hypomethylated |
| cg20664636 | 0.541633 | 0.23487  | 0.433632 | <i>HIC1</i>     | hypomethylated |
| cg15391590 | 0.560985 | 0.233619 | 0.416444 | <i>ICK</i>      | hypomethylated |
| cg10262052 | 0.456882 | 0.2166   | 0.474082 | <i>IDO1</i>     | hypomethylated |
| cg00082235 | 0.313341 | 0.111398 | 0.355516 | <i>IFFO1</i>    | hypomethylated |
| cg00363813 | 0.484223 | 0.173106 | 0.357492 | <i>IFFO1</i>    | hypomethylated |
| cg00983904 | 0.404769 | 0.100503 | 0.248297 | <i>IFFO1</i>    | hypomethylated |
| cg01493517 | 0.418647 | 0.170229 | 0.406618 | <i>IFFO1</i>    | hypomethylated |
| cg01979888 | 0.499811 | 0.179072 | 0.35828  | <i>IFFO1</i>    | hypomethylated |
| cg08875705 | 0.49337  | 0.122401 | 0.248092 | <i>IFFO1</i>    | hypomethylated |
| cg17198308 | 0.459341 | 0.158182 | 0.344367 | <i>IFFO1</i>    | hypomethylated |
| cg22203219 | 0.362442 | 0.1621   | 0.447245 | <i>IFFO1</i>    | hypomethylated |
| cg23737737 | 0.402353 | 0.105681 | 0.262658 | <i>IFFO1</i>    | hypomethylated |
| cg02309273 | 0.420814 | 0.16572  | 0.393807 | <i>INPP5B</i>   | hypomethylated |
| cg05749969 | 0.49754  | 0.205922 | 0.41388  | <i>INPP5B</i>   | hypomethylated |
| cg10784030 | 0.383114 | 0.159252 | 0.415677 | <i>INPP5B</i>   | hypomethylated |
| cg17949727 | 0.447704 | 0.123924 | 0.276799 | <i>INPP5B</i>   | hypomethylated |
| cg23262274 | 0.390876 | 0.190537 | 0.487463 | <i>INPP5B</i>   | hypomethylated |

|            |          |          |          |                   |                |
|------------|----------|----------|----------|-------------------|----------------|
| cg14524975 | 0.522985 | 0.214487 | 0.41012  | <i>ITGB7</i>      | hypomethylated |
| cg22945413 | 0.478341 | 0.229284 | 0.479332 | <i>JAK1</i>       | hypomethylated |
| cg11185792 | 0.485403 | 0.186616 | 0.384456 | <i>KCNAB2</i>     | hypomethylated |
| cg03957481 | 0.389937 | 0.151514 | 0.388561 | <i>KLHDC7B</i>    | hypomethylated |
| cg04873061 | 0.265842 | 0.624071 | 2.34753  | <i>LAMB3</i>      | hypemethylated |
| cg03987786 | 0.38321  | 0.169782 | 0.443052 | <i>LOC1001282</i> | hypomethylated |
| cg17227257 | 0.264931 | 0.616585 | 2.327342 | <i>LOC1001308</i> | hypemethylated |
| cg19255477 | 0.326651 | 0.124619 | 0.381505 | <i>LOC1001321</i> | hypomethylated |
| cg26426745 | 0.399701 | 0.129105 | 0.323004 | <i>LOC1001321</i> | hypomethylated |
| cg12409149 | 0.266871 | 0.609971 | 2.28564  | <i>LOC1002707</i> | hypemethylated |
| cg05429448 | 0.505679 | 0.247902 | 0.490236 | <i>LOC152225</i>  | hypomethylated |
| cg09550041 | 0.198849 | 0.46391  | 2.332972 | <i>LRRC52</i>     | hypemethylated |
| cg01270001 | 0.056313 | 0.267278 | 4.746288 | <i>LRRC61</i>     | hypemethylated |
| cg10348193 | 0.06322  | 0.283151 | 4.478798 | <i>LRRC61</i>     | hypemethylated |
| cg11026333 | 0.027539 | 0.229677 | 8.339962 | <i>LRRC61</i>     | hypemethylated |
| cg05433805 | 0.59619  | 0.286969 | 0.481338 | <i>LRRFIP2</i>    | hypomethylated |
| cg27640763 | 0.334742 | 0.134694 | 0.402381 | <i>LUM</i>        | hypomethylated |
| cg13702222 | 0.174473 | 0.377391 | 2.163028 | <i>MBNL1</i>      | hypemethylated |
| cg03078520 | 0.205279 | 0.452089 | 2.202317 | <i>MICAL3</i>     | hypemethylated |
| cg10769535 | 0.731889 | 0.30186  | 0.41244  | <i>MIR199A2</i>   | hypomethylated |
| cg03775802 | 0.530182 | 0.256064 | 0.482973 | <i>MIR609</i>     | hypomethylated |
| cg15856028 | 0.459369 | 0.21658  | 0.471472 | <i>MIR938</i>     | hypomethylated |
| cg09530163 | 0.405757 | 0.129455 | 0.319044 | <i>MMP2</i>       | hypomethylated |
| cg13689560 | 0.347205 | 0.101869 | 0.293397 | <i>MOBKL2A</i>    | hypomethylated |
| cg20761290 | 0.35095  | 0.14525  | 0.413876 | <i>MS4A7</i>      | hypomethylated |
| cg00121389 | 0.328109 | 0.118396 | 0.360843 | <i>MTUS1</i>      | hypomethylated |
| cg06752054 | 0.3473   | 0.079274 | 0.228258 | <i>MX2</i>        | hypomethylated |
| cg21130374 | 0.517409 | 0.14933  | 0.288611 | <i>MX2</i>        | hypomethylated |
| cg20363347 | 0.232581 | 0.46973  | 2.019635 | <i>MYEOV</i>      | hypemethylated |
| cg03079497 | 0.214922 | 0.432473 | 2.012233 | <i>MYOIC</i>      | hypemethylated |
| cg09825309 | 0.399627 | 0.188283 | 0.471147 | <i>NCOR2</i>      | hypomethylated |
| cg17132902 | 0.390095 | 0.178005 | 0.456313 | <i>NOS1</i>       | hypomethylated |

|            |          |          |          |                 |                |
|------------|----------|----------|----------|-----------------|----------------|
| cg10465672 | 0.122165 | 0.367512 | 3.008335 | <i>OCIAD2</i>   | hypemethylated |
| cg08794954 | 0.401915 | 0.175006 | 0.43543  | <i>ODZ4</i>     | hypomethylated |
| cg05094216 | 0.205388 | 0.439385 | 2.13929  | <i>P2RY12</i>   | hypemethylated |
| cg06103394 | 0.07728  | 0.437452 | 5.660611 | <i>PAQR4</i>    | hypemethylated |
| cg01311181 | 0.380225 | 0.149393 | 0.392907 | <i>PARVG</i>    | hypomethylated |
| cg05148373 | 0.299823 | 0.079243 | 0.264298 | <i>PDE1A</i>    | hypomethylated |
| cg08759112 | 0.502301 | 0.220188 | 0.438358 | <i>PDE1A</i>    | hypomethylated |
| cg10058920 | 0.361679 | 0.147459 | 0.407708 | <i>PDYN</i>     | hypomethylated |
| cg04142864 | 0.491347 | 0.167466 | 0.340829 | <i>PHLDB1</i>   | hypomethylated |
| cg20309703 | 0.357485 | 0.119581 | 0.334507 | <i>PHLDB1</i>   | hypomethylated |
| cg22466012 | 0.509054 | 0.143078 | 0.281067 | <i>PLD1</i>     | hypomethylated |
| cg22451657 | 0.356599 | 0.739616 | 2.074087 | <i>PLEKHG5</i>  | hypemethylated |
| cg13645732 | 0.285474 | 0.039594 | 0.138697 | <i>PPP1R13L</i> | hypomethylated |
| cg19426388 | 0.359111 | 0.149394 | 0.41601  | <i>PPP1R13L</i> | hypomethylated |
| cg02712036 | 0.372277 | 0.097159 | 0.260986 | <i>RAB27A</i>   | hypomethylated |
| cg01246520 | 0.25891  | 0.703227 | 2.716104 | <i>RAI1</i>     | hypemethylated |
| cg16656875 | 0.529236 | 0.070056 | 0.132372 | <i>SCML4</i>    | hypomethylated |
| cg17197774 | 0.456217 | 0.217758 | 0.477312 | <i>SDCBP</i>    | hypomethylated |
| cg24924577 | 0.258027 | 0.560446 | 2.172047 | <i>SEMA4B</i>   | hypemethylated |
| cg25310824 | 0.191992 | 0.414754 | 2.160268 | <i>SEPP1</i>    | hypemethylated |
| cg03052162 | 0.420995 | 0.182589 | 0.433709 | <i>SHMT2</i>    | hypomethylated |
| cg21982437 | 0.386161 | 0.176978 | 0.458302 | <i>SIGLECP3</i> | hypomethylated |
| cg21853021 | 0.313685 | 0.081432 | 0.259597 | <i>SLC22A18</i> | hypomethylated |
| cg05090759 | 0.202769 | 0.41209  | 2.032316 | <i>SLC38A11</i> | hypemethylated |
| cg01289541 | 0.448635 | 0.216168 | 0.481835 | <i>SLC7A14</i>  | hypomethylated |
| cg20704148 | 0.161794 | 0.768343 | 4.748892 | <i>SLCO2B1</i>  | hypemethylated |
| cg01778994 | 0.467425 | 0.1999   | 0.427662 | <i>ST3GAL1</i>  | hypomethylated |
| cg00464095 | 0.472693 | 0.236113 | 0.499506 | <i>STAR</i>     | hypomethylated |
| cg07092525 | 0.354881 | 0.140659 | 0.396355 | <i>STAR</i>     | hypomethylated |
| cg09630404 | 0.3589   | 0.146964 | 0.409486 | <i>STAR</i>     | hypomethylated |
| cg18406492 | 0.442985 | 0.180379 | 0.40719  | <i>STAR</i>     | hypomethylated |
| cg14462124 | 0.632701 | 0.290959 | 0.459868 | <i>STK17B</i>   | hypomethylated |

|            |          |          |          |                 |                |
|------------|----------|----------|----------|-----------------|----------------|
| cg15856028 | 0.459369 | 0.21658  | 0.471472 | <i>SVIL</i>     | hypomethylated |
| cg17194270 | 0.349923 | 0.709926 | 2.028806 | <i>SYNGR1</i>   | hypemethylated |
| cg20496314 | 0.296262 | 0.592915 | 2.001322 | <i>SYNGR1</i>   | hypemethylated |
| cg02829601 | 0.422678 | 0.161128 | 0.381208 | <i>SYTL3</i>    | hypomethylated |
| cg09826188 | 0.111206 | 0.331275 | 2.978938 | <i>TBC1D23</i>  | hypemethylated |
| cg16984944 | 0.185897 | 0.392919 | 2.113641 | <i>TBC1D23</i>  | hypemethylated |
| cg04272820 | 0.266479 | 0.546527 | 2.050917 | <i>THRA</i>     | hypemethylated |
| cg22839308 | 0.498393 | 0.240268 | 0.482086 | <i>TLR1</i>     | hypomethylated |
| cg16585333 | 0.339926 | 0.132736 | 0.390484 | <i>TLR5</i>     | hypomethylated |
| cg27639199 | 0.12006  | 0.658895 | 5.488059 | <i>TMC3</i>     | hypemethylated |
| cg15961993 | 0.633854 | 0.296372 | 0.467571 | <i>TMEM108</i>  | hypomethylated |
| cg00463982 | 0.381111 | 0.165119 | 0.433257 | <i>TMEM204</i>  | hypomethylated |
| cg06602086 | 0.501773 | 0.17139  | 0.341569 | <i>TMEM204</i>  | hypomethylated |
| cg07341220 | 0.405345 | 0.191743 | 0.473037 | <i>TMEM204</i>  | hypomethylated |
| cg15694715 | 0.274113 | 0.623154 | 2.273344 | <i>TMEM25</i>   | hypemethylated |
| cg14886269 | 0.114699 | 0.33983  | 2.962784 | <i>TNFRSF18</i> | hypemethylated |
| cg05802478 | 0.269599 | 0.540746 | 2.005744 | <i>TNK2</i>     | hypemethylated |
| cg21008828 | 0.141921 | 0.370077 | 2.607617 | <i>TNK2</i>     | hypemethylated |
| cg21642245 | 0.125242 | 0.35061  | 2.799461 | <i>TNK2</i>     | hypemethylated |
| cg26740249 | 0.21973  | 0.485247 | 2.208374 | <i>TNRC6C</i>   | hypemethylated |
| cg09548780 | 0.145044 | 0.411983 | 2.840404 | <i>TNS1</i>     | hypemethylated |
| cg07241084 | 0.489432 | 0.192879 | 0.394088 | <i>TNS3</i>     | hypomethylated |
| cg01824466 | 0.502017 | 0.237752 | 0.473593 | <i>TP53INP1</i> | hypomethylated |
| cg03270395 | 0.179376 | 0.391998 | 2.185343 | <i>TRAF3IP2</i> | hypemethylated |
| cg05423393 | 0.204691 | 0.462905 | 2.261488 | <i>TRAF3IP2</i> | hypemethylated |
| cg02735762 | 0.472618 | 0.20553  | 0.434875 | <i>TTF1</i>     | hypomethylated |
| cg14786652 | 0.567648 | 0.27217  | 0.479469 | <i>TLL10</i>    | hypomethylated |
| cg21288685 | 0.362804 | 0.161869 | 0.446162 | <i>TLL10</i>    | hypomethylated |
| cg25134306 | 0.519754 | 0.234386 | 0.450956 | <i>UBE2D2</i>   | hypomethylated |
| cg16719560 | 0.324209 | 0.106436 | 0.328295 | <i>VAMP5</i>    | hypomethylated |
| cg04814784 | 0.323919 | 0.818259 | 2.526127 | <i>VHL</i>      | hypemethylated |
| cg09433910 | 0.497816 | 0.208153 | 0.418132 | <i>WDR81</i>    | hypomethylated |

|            |          |          |          |                |                |
|------------|----------|----------|----------|----------------|----------------|
| cg10080732 | 0.463315 | 0.142253 | 0.307034 | <i>WDR81</i>   | hypomethylated |
| cg17165848 | 0.449614 | 0.105934 | 0.235612 | <i>WIPF1</i>   | hypomethylated |
| cg22047295 | 0.4127   | 0.088085 | 0.213436 | <i>WIPF1</i>   | hypomethylated |
| cg15559674 | 0.495359 | 0.23427  | 0.47293  | <i>ZC3H12D</i> | hypomethylated |
| cg04920761 | 0.100922 | 0.327336 | 3.243456 | <i>ZFP36L2</i> | hypemethylated |
| cg17280346 | 0.41156  | 0.200206 | 0.486455 | <i>ZIC1</i>    | hypomethylated |
| cg18121066 | 0.28358  | 0.764495 | 2.695875 | <i>ZNF750</i>  | hypemethylated |
